# Supplementary material for: Size dependent electronic structure of LiFePO4 probed using X-ray absorption and Mössbauer spectroscopy
Source: Royal Society of Chemistry journal article supplement (doi:10.1039/d2cp00411a), 2022-01-01
Supplement: d2cp00411a1.pdf [file d2cp00411a1.pdf]

# Electronic Supplementary Information (ESI):

## Size Dependent Electronic Structure of $\text{LiFePO}_4$ probed by X-ray Absorption and Mössbauer Spectroscopy

Mahboob Ali<sup>a</sup>, Nataliya Tsud<sup>b</sup>, Sher Singh Meena<sup>c</sup> and Sevi Murugavel<sup>a\*</sup>

<sup>a</sup> Department of Physics and Astrophysics, University of Delhi, Delhi-110 007, India

<sup>b</sup> Charles University, Faculty of Mathematics and Physics, Department of Surface and Plasma Science, V Holešovičkách 2, 18000 Prague, Czech Republic

<sup>c</sup> Solid State Physics Division, Bhabha Atomic Research Centre, Mumbai - 400085, India

From the Rietveld refinement we have estimated the lattice parameters which were initially taken from the literature.<sup>1</sup> The fitting was done for the entire data set collected in the  $2\theta$  range. Further insightful structural details have been analysed by refining the site occupancies for lithium and iron as well as the atomic positions. During the first stage of the refinement, all the parameters including the atomic positions of respective atoms were kept as reported in the literature and all the occupancies to their nominal values. The Li and Fe occupancies were allowed to vary free of constraint and after each step the value obtained were used as starting parameters for the next step. Same procedure was opted for the refinement of the atomic positions and the profile fitting. To get a better refinement or in other words we can say, to achieve a better fit between the experimental and the calculated pattern, all the parameters were refined sequentially, and we were able to get the best fit as evident from the goodness of fit values (1 for an ideal case). Refined profile obtained from the Rietveld analysis for 50 nm CS LFP is shown in the Figure S2 with a  $\chi^2$  value of 2.494.

- 1 P. Gibot, M. Casas-cabanas, L. Laffont, S. Levasseur, P. Carlach, S. Hamelet, J. M. Tarascon and C. Masquelier, Nat. Mater., 7, (2008) 741–747.

**Table TS1** Rietveld Refinement parameters for bulk (50 nm) and 25 nm crystallite sizes.

| <b>Crystallite Size</b>                     |              |            | <b>50 nm</b> |                |                  |
|---------------------------------------------|--------------|------------|--------------|----------------|------------------|
| <b>Wavelength (<math>\text{\AA}</math>)</b> |              |            | 0.78799      |                |                  |
| <b>Space Group</b>                          |              |            | <i>Pmna</i>  |                |                  |
|                                             |              |            | Errors (%)   |                |                  |
| <b><i>a</i> (<math>\text{\AA}</math>)</b>   |              |            | 10.33917     | <i>1.6E-4</i>  |                  |
| <b><i>b</i> (<math>\text{\AA}</math>)</b>   |              |            | 6.02085      | <i>1E-4</i>    |                  |
| <b><i>c</i> (<math>\text{\AA}</math>)</b>   |              |            | 4.69319      | <i>1.8E-4</i>  |                  |
| <b><i>V</i> (<math>\text{\AA}^3</math>)</b> |              |            | 292.14415    | <i>0.02251</i> |                  |
| <b><i>Li</i><sup>+</sup> Vacancies (%)</b>  |              |            | 6.7          | <i>1.56</i>    |                  |
| <b><i>R<sub>p</sub></i> (%)</b>             |              |            | 4.61         |                |                  |
| <b><i>R<sub>wp</sub></i> (%)</b>            |              |            | 5.30         |                |                  |
| <b><i>GOF</i> (<math>\chi^2</math>)</b>     |              |            | 2.494        |                |                  |
| <b>Site</b>                                 | <b>Wyck.</b> | <b>x/a</b> | <b>y/b</b>   | <b>z/c</b>     | <b>Occupancy</b> |
| Li                                          | 4a           | 0.0000     | 0.0000       | 0.0000         | 0.9330           |
| Fe                                          | 4c           | 0.2823     | 0.2500       | 0.9737         | 0.9977           |
| P                                           | 4c           | 0.0959     | 0.2500       | 0.4192         | 1.0000           |
| O                                           | 4c           | 0.0949     | 0.2500       | 0.7414         | 1.0000           |
| O                                           | 4c           | 0.4590     | 0.2500       | 0.2065         | 1.0000           |
| O                                           | 8d           | 0.1653     | 0.0481       | 0.2849         | 1.0000           |
| Fe                                          | 4a           | 0.0000     | 0.0000       | 0.0000         | 0.0023           |

|                                      |              |            |              |            |                  |
|--------------------------------------|--------------|------------|--------------|------------|------------------|
| <b>Crystallite Size</b>              |              |            | <b>25 nm</b> |            |                  |
| <b>Wavelength (Å)</b>                |              |            | 0.78799      |            |                  |
| <b>Space Group</b>                   |              |            | <i>Pmna</i>  |            |                  |
|                                      |              |            | Errors (%)   |            |                  |
| <i>a</i> (Å)                         |              |            | 10.31511     | 2.22E-4    |                  |
| <i>b</i> (Å)                         |              |            | 6.0010       | 1.48E-4    |                  |
| <i>c</i> (Å)                         |              |            | 4.70095      | 1.11E-4    |                  |
| <i>V</i> (Å <sup>3</sup> )           |              |            | 290.99339    | 0.02031    |                  |
| <i>Li</i> <sup>+</sup> Vacancies (%) |              |            | 17.1         | 1.87       |                  |
| <b><i>R<sub>p</sub></i> (%)</b>      |              |            | 3.42         |            |                  |
| <b><i>R<sub>wp</sub></i> (%)</b>     |              |            | 4.55         |            |                  |
| <b><i>GOF</i> (χ<sup>2</sup>)</b>    |              |            | 1.25         |            |                  |
| <b>Site</b>                          | <b>Wyck.</b> | <b>x/a</b> | <b>y/b</b>   | <b>z/c</b> | <b>Occupancy</b> |
| Li                                   | 4a           | 0.0000     | 0.0000       | 0.0000     | 0.8291           |
| Fe                                   | 4c           | 0.2820     | 0.25         | 0.9731     | 0.9964           |
| P                                    | 4c           | 0.0953     | 0.25         | 0.4193     | 1.0000           |
| O                                    | 4c           | 0.0962     | 0.25         | 0.7404     | 1.0000           |
| O                                    | 4c           | 0.4579     | 0.25         | 0.2056     | 1.0000           |
| O                                    | 8d           | 0.1653     | 0.0491       | 0.2828     | 1.0000           |
| Fe                                   | 4a           | 0.0000     | 0.0000       | 0.0000     | 0.0050           |

**Table TS2** Crystallite size dependent unit cell parameters and lithium vacancy concentration for LFP extracted through Rietveld refinement analysis.

| Crystallite Size (nm) | Lattice parameters |        |        | Cell Volume (Å <sup>3</sup> ) | Lithium ion vacancy (%) |
|-----------------------|--------------------|--------|--------|-------------------------------|-------------------------|
|                       | a (Å)              | b (Å)  | c (Å)  |                               |                         |
| 50 ± 1.9              | 10.3391            | 6.0208 | 4.6931 | 292.144                       | 6.70                    |
| 40 ± 1.7              | 10.3357            | 6.0162 | 4.6940 | 291.8786                      | 8.23                    |
| 35 ± 2.0              | 10.3328            | 6.0133 | 4.6968 | 291.8351                      | 13.03                   |
| 31 ± 1.6              | 10.3227            | 6.0070 | 4.6992 | 291.3867                      | 14.76                   |
| 25 ± 2.19             | 10.3151            | 6.001  | 4.7009 | 290.9933                      | 17.1                    |

**Table TS3** Lattice parameters along with Lithium vacancy calculated from the Rietveld refinement for LiFePO<sub>4</sub> with different crystallite sizes.

| Crystallite Size (nm) | Fe-O1 (Å) | Fe-O2 (Å) | Fe-O3 (Å) | Fe-O3' (Å) | Avg. (Å) |
|-----------------------|-----------|-----------|-----------|------------|----------|
| 50                    | 2.221     | 2.183     | 2.233     | 2.107      | 2.186    |
| 40                    | 2.224     | 2.192     | 2.253     | 2.073      | 2.185    |
| 35                    | 2.215     | 2.175     | 2.228     | 2.121      | 2.184    |
| 31                    | 2.204     | 2.212     | 2.220     | 2.077      | 2.178    |
| 25                    | 2.206     | 2.153     | 2.219     | 2.081      | 2.159    |

**Table TS4** The isomer shift ( $\delta$ ), quadrupole splitting ( $\Delta E_Q$ : doublet), outer linewidth ( $\Gamma$ ) and relative areas ( $R_A$ ) in percentage of different sites of  $\text{Fe}^{3+}$  or  $\text{Fe}^{2+}$  ions for all five samples derived from Mössbauer spectra recorded at room temperature. Isomer shift values are relative to Fe metal foil ( $\delta = 0.0 \text{ mms}^{-1}$ ).  $\chi^2$ : goodness of fit.

| Sample (code) | Iron Sites                     | $\Delta E_Q$ ( $\text{mms}^{-1}$ )<br>$\pm 0.03$ | $\delta$ ( $\text{mms}^{-1}$ )<br>$\pm 0.01$ | $\Gamma$ ( $\text{mms}^{-1}$ )<br>$\pm 0.03$ | $R_A$ (%) | $\chi^2$ |
|---------------|--------------------------------|--------------------------------------------------|----------------------------------------------|----------------------------------------------|-----------|----------|
| 25 nm         | Doublet-A ( $\text{Fe}^{2+}$ ) | 2.970                                            | 1.216                                        | 0.283                                        | 87.8      | 2.76     |
|               | Doublet-B ( $\text{Fe}^{3+}$ ) | 0.808                                            | 0.481                                        | 0.513                                        | 12.2      |          |
| 31 nm         | Doublet-A ( $\text{Fe}^{2+}$ ) | 2.995                                            | 1.225                                        | 0.330                                        | 94.2      | 2.59     |
|               | Doublet-B ( $\text{Fe}^{3+}$ ) | 0.724                                            | 0.488                                        | 0.519                                        | 5.8       |          |
| 35 nm         | Doublet-A ( $\text{Fe}^{2+}$ ) | 2.981                                            | 1.247                                        | 0.300                                        | 94.5      | 1.95     |
|               | Doublet-B ( $\text{Fe}^{3+}$ ) | 0.850                                            | 0.474                                        | 0.359                                        | 5.5       |          |
| 40 nm         | Doublet-A ( $\text{Fe}^{2+}$ ) | 2.991                                            | 1.225                                        | 0.318                                        | 95.6      | 1.38     |
|               | Doublet-B ( $\text{Fe}^{3+}$ ) | 0.812                                            | 0.480                                        | 0.428                                        | 4.4       |          |
| 50 nm         | Doublet-A ( $\text{Fe}^{2+}$ ) | 2.970                                            | 1.217                                        | 0.298                                        | 97.2      | 3.0      |
|               | Doublet-B ( $\text{Fe}^{3+}$ ) | 0.608                                            | 0.582                                        | 0.435                                        | 2.8       |          |

**Table TS5** Simulation parameters for LFP different crystallite sizes related to the  $D_{4h}$  symmetry.

| Crystallite Size (nm) | 10Dq (eV) (obtained from Fe L edge) | 10Dq (eV) (obtained from O K edge) | $D_s$ (eV) | $D_t$ (eV) | $\Delta t_{2g}$ (eV) | $\Delta e_g$ (eV) |
|-----------------------|-------------------------------------|------------------------------------|------------|------------|----------------------|-------------------|
| 50                    | 1.32                                | 1.497                              | 0.28       | 0.05       | 0.59                 | 1.37              |
| 40                    | 1.30                                | 1.381                              | 0.48       | 0.09       | 0.99                 | 2.37              |
| 35                    | 1.28                                | 1.31                               | 0.45       | 0.09       | 0.90                 | 2.25              |
| 31                    | 1.25                                | 1.242                              | 0.42       | 0.12       | 0.66                 | 2.28              |
| 25                    | 1.27                                | 1.272                              | 0.48       | 0.09       | 0.99                 | 2.37              |

**Table TS6** Fe 3d orbital energies in LFP with  $D_{4h}$  symmetry calculated for different crystallite sizes.

| <b>Crystallite Size (nm)</b> | <b><math>B_{1g}</math> (eV)</b> | <b><math>a_{1g}</math> (eV)</b> | <b><math>B_{2g}</math> (eV)</b> | <b><math>e_g</math> (eV)</b> |
|------------------------------|---------------------------------|---------------------------------|---------------------------------|------------------------------|
| <b>50</b>                    | <b>1.302</b>                    | <b>-0.068</b>                   | <b>-0.018</b>                   | <b>-0.608</b>                |
| <b>40</b>                    | <b>1.650</b>                    | <b>-0.720</b>                   | <b>0.320</b>                    | <b>-0.640</b>                |
| <b>35</b>                    | <b>1.578</b>                    | <b>-0.672</b>                   | <b>0.298</b>                    | <b>-0.602</b>                |
| <b>31</b>                    | <b>1.470</b>                    | <b>-0.810</b>                   | <b>0.220</b>                    | <b>-0.440</b>                |
| <b>25</b>                    | <b>1.632</b>                    | <b>-0.738</b>                   | <b>0.362</b>                    | <b>-0.628</b>                |

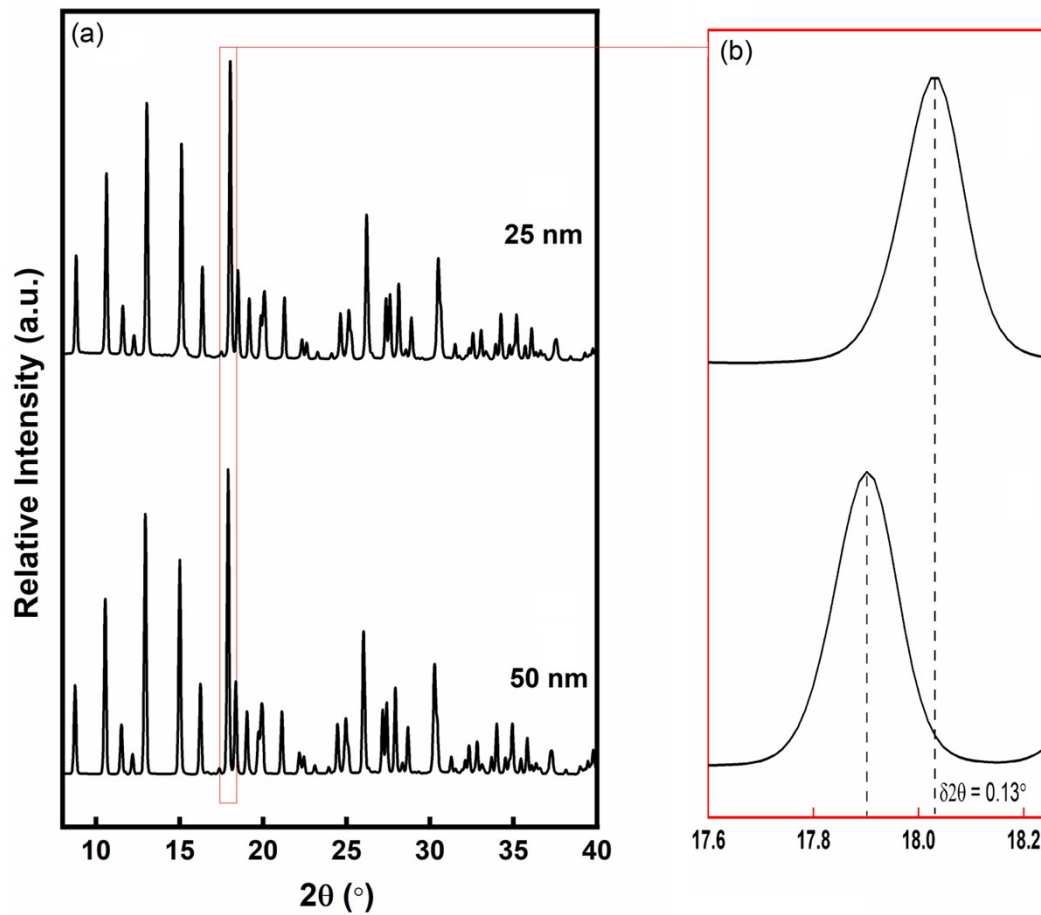

**Fig. S1** (a) XRD pattern of olivine  $\text{LiFePO}_4$  for 50 and 25 nm crystallite sizes measured at the room temperature with the synchrotron source ( $\lambda=0.78799 \text{ \AA}$ ), (b) Magnification of (211/020) diffraction peak shows the broadening and shift towards higher angle with decrease in the crystallite size.

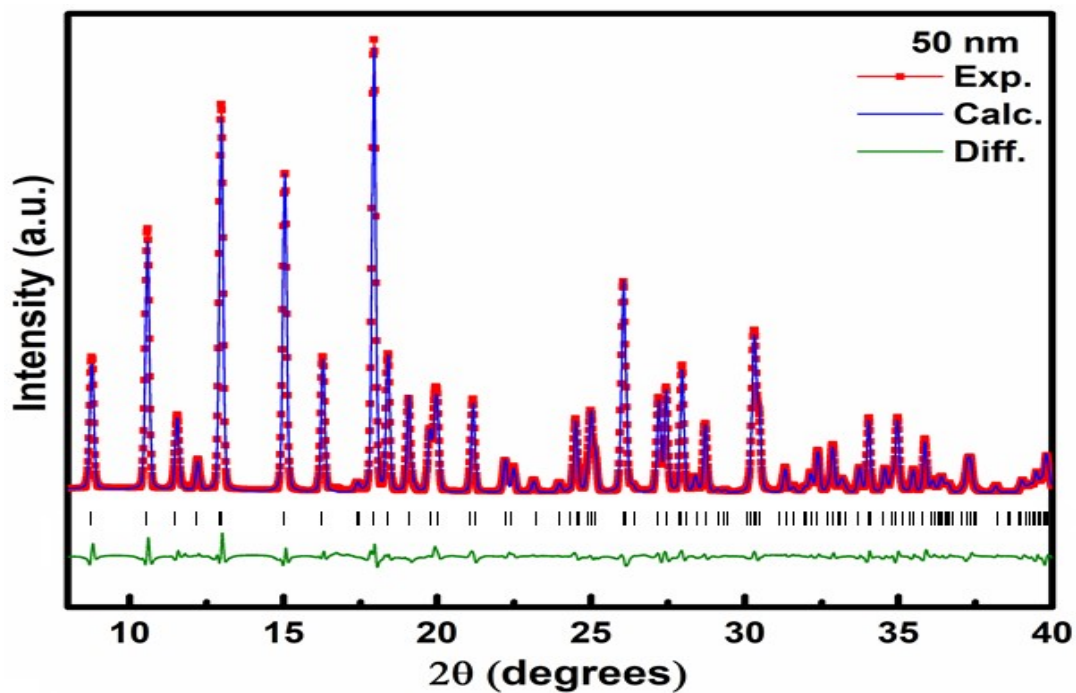

**Fig. S2** Experimental X-ray powder diffraction pattern (filled square with red colour) of  $\text{LiFePO}_4$  sample is compared to the Rietveld refined profile (continuous blue line) and the difference curve (bottom green curve) taken at room temperature. The vertical markers (black) below the diffraction pattern indicate positions of possible Bragg reflections for  $\text{LiFePO}_4$ .



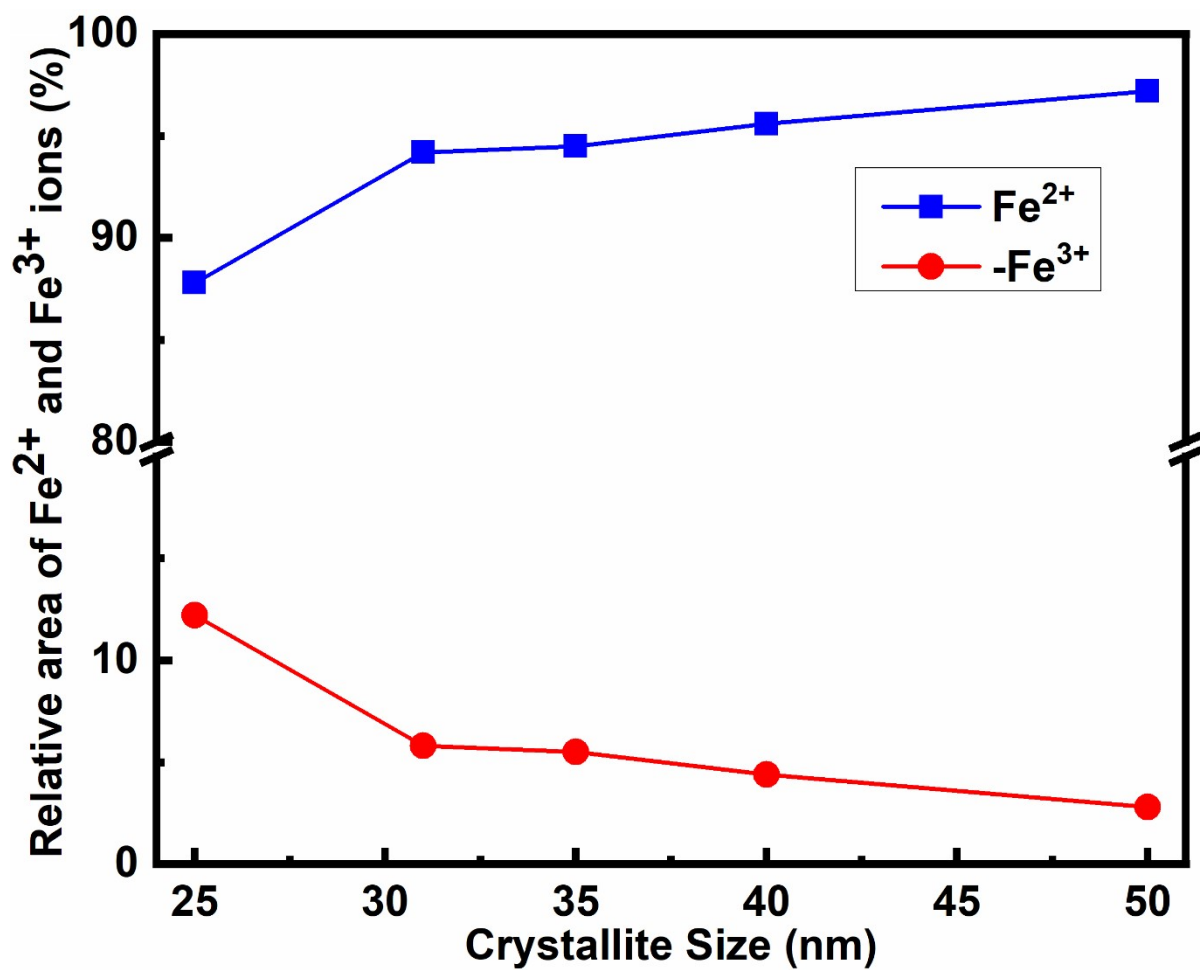

Fig. S3 Change in relative areas in percentage of different sites of Fe<sup>3+</sup> and Fe<sup>2+</sup> ions with respect Crystallite Size (nm) fitted from Mössbauer spectra in Fig. 3.
